# Supplementary material for: Incidence of giant cell arteritis in Western Norway 1972–2012: a retrospective cohort study
Source: PubMed Central journal article supplement (PMC5732381; doi:10.1186/s13075-017-1479-6), 2017-12-15
Supplement: 13075_2017_1479_MOESM1_ESM.pdf [file 13075_2017_1479_MOESM1_ESM.pdf]

Register only information present in the medical record at time of or after first consultation with the diagnosis of GCA.  
 Insert numerical value or mark the correct alternative answer. If doubt – mark with asterix and supply further details on page 2.

Patient identifier (PID): \_\_\_\_\_ Year of birth: \_\_\_\_\_ Sex (M/F): \_\_\_\_\_ Record review by (initials/date): \_\_\_\_\_

Time of first registration with ICD-code for GCA: \_\_\_\_\_ Diagnosed by (unit/type of specialist): \_\_\_\_\_  
 Year of diagnosis: \_\_\_\_\_ Year of symptom debut: \_\_\_\_\_

**ACR-criteria 1990**

| Criteria |                                            | No = 0 | Yes = 1 | Unsure = 2 | Information unavailable = 9 |
|----------|--------------------------------------------|--------|---------|------------|-----------------------------|
| i        | Age $\geq$ 50 years at disease onset       |        |         |            |                             |
| ii       | New onset localized headache               |        |         |            |                             |
| iii NB   | Tenderness or ...                          |        |         |            |                             |
| iii NB   | ... decreased pulsation in temporal artery |        |         |            |                             |
| iv       | ESR $\geq$ 50 mm/hour                      |        |         |            |                             |
| v        | Arteritis on temporal artery biopsy        |        |         |            |                             |
| -        | Giant cells in biopsy                      |        |         |            |                             |

|                                                    |         |     |      |                                             |
|----------------------------------------------------|---------|-----|------|---------------------------------------------|
| Are the ACR-criteria for GCA fulfilled ( $\geq$ 3) | Unsure: | No: | Yes: | End registration if answer is "No" and "No" |
| Is GCA a probable diagnosis in your opinion?       | Unsure: | No: | Yes: |                                             |

**Laboratory results at time of diagnosis (numerical value/unit):**

|                                                                  | CRP | ESR | Hemoglobin | WCC | Neutrofiles | Eosinofils | Platelets | Creatinin | ALAT |
|------------------------------------------------------------------|-----|-----|------------|-----|-------------|------------|-----------|-----------|------|
| Test result at time of diagnosis (before treatment with steroid) |     |     |            |     |             |            |           |           |      |

|                                                                  | Rheumatoid factor | ACPA | ANA | Which ANA-subgroup? | ANCA | Which ANCA sub-group? | Other relevant |
|------------------------------------------------------------------|-------------------|------|-----|---------------------|------|-----------------------|----------------|
| Test result at time of diagnosis (before treatment with steroid) |                   |      |     |                     |      |                       |                |

**Clinical features at time of diagnosis:**

|                                                | N = 0 | Y = 1 | U = 2 | I.U. = 9 | Comments/further details:                   |
|------------------------------------------------|-------|-------|-------|----------|---------------------------------------------|
| Jaw claudication                               |       |       |       |          |                                             |
| Visual disturbance (related to arteritis)      |       |       |       |          | Subjective: ___ Objective: ___              |
| Scalp necrosis                                 |       |       |       |          |                                             |
| Clinically suspect arteritis outside head/neck |       |       |       |          |                                             |
| Hypertension                                   |       |       |       |          |                                             |
| Previous cardiovascular disease                |       |       |       |          | Cerebral: ___ Coronary: ___ Peripheral: ___ |
| Polymyalgia rheumatica                         |       |       |       |          |                                             |
| Peripheral arthritis                           |       |       |       |          |                                             |
| Other relevant:                                |       |       |       |          | Diabetes?: ___ Smoking?: ___                |

**Treatment:**

Steroid-treatment at time of diagnosis (name, route of administration and initial dose of chosen steroid): \_\_\_\_\_

Maximum steroid-dose before tapering-regimen (name, route of administration and dose): \_\_\_\_\_

| <b>Temporally related</b>                      | N = 0 | Y = 1 | U = 2 | I.U. = 9 | Comments/which specific medication:                                       |
|------------------------------------------------|-------|-------|-------|----------|---------------------------------------------------------------------------|
| Bone-protective treatment following diagnosis? |       |       |       |          | Calcium/Vitamin D: ___ Bisphosphonate: ___ PTH-analogue: ___ Other: _____ |
| DMARD-treatment following diagnosis?           |       |       |       |          |                                                                           |
| Anti-platelet-treatment following diagnosis?   |       |       |       |          |                                                                           |

**Outcomes:**

|                                                           | Year – if applicable | N = 0 | Y = 1 | U = 2 | I.U. = 9 | Comments/further details:                                                      |
|-----------------------------------------------------------|----------------------|-------|-------|-------|----------|--------------------------------------------------------------------------------|
| Vascular/large artery complication?                       |                      |       |       |       |          | Thoracic AA: ___ Abdominal AA: ___ Dissection: ___ Other: _____                |
| Death                                                     |                      |       |       |       |          | Cause of death? Sudden death?                                                  |
| Femoral fracture                                          |                      |       |       |       |          | Low-energy?                                                                    |
| Cardiovascular disease – diagnosed after diagnosis of GCA |                      |       |       |       |          | Cerebral: ___ Coronary: ___ Peripheral: ___ <b>Aortic valve disease:</b> _____ |

**Source of recorded information:** (mark one or several sources)

Computerized hospital records, Haukeland/Voss

Computerized hospital records, Haraldsplass

Paper files/Central archive

If paper files, from which department(s)? \_\_\_\_\_

\_\_\_\_\_

\_\_\_\_\_

**Other relevant information and comments/further details to information on previous page:**
